# Supplementary material
Source: Research Square preprint supplement (doi:10.21203/rs.3.rs-8883345/v1)
Supplement: Supplementary file 1 [file f9ab4836d26745464ddad211.docx]

**Ecological and behavioural responses of butterflyfishes to coral reef restoration**

**Supplementary Information**

**Table S1.** Outputs from generalised linear mixed-effects models (Gaussian distribution with identity link) testing the effect of restoration age on butterflyfish abundance.

| Fixed effect (Restoration age) | Model estimates (±SE) | Post-hoc comparison | Estimate±SE | Tukey’s HSD *p* |
| --- | --- | --- | --- | --- |
| Butterflyfish abundance (Gaussian GLMM: χ² = 14.18, df = 29, *p* < 0.001) | | | | |
| Degraded (baseline) | 0.0106 ± 0.0331 |  |  |  |
| Age 1 | 0.0200 ± 0.0606 | Degraded vs Age 1 | -0.009 ± 0.057 | 1.00 |
| Age 2 | 0.0160 ± 0.0428 | Degraded vs Age 2 | -0.005 ± 0.045 | 1.00 |
| Age 3 | 0.0430 ± 0.0395 | Degraded vs Age 3 | -0.032 ± 0.042 | 0.99 |
| Age 5 | 0.0525 ± 0.0285 | Degraded vs Age 5 | -0.042 ± 0.036 | 0.93 |
| Age 6 | **0.1270 ± 0.0279** | Degraded vs Age 6 | **-0.116 ± 0.035** | **0.044** |
| Age 7 | **0.1170 ± 0.0395** | Degraded vs Age 7 | -0.106 ± 0.042 | 0.21 |
| Healthy | **0.1095 ± 0.0279** | Degraded vs Healthy | -0.099 ± 0.035 | 0.13 |
| Random effect: Site: 0.0019 ± 0.043 | | | | |

*Bolded estimates indicate ages where butterflyfish abundance was significantly greater than zero (95% CI not overlapping zero)*

**Table S2.** Outputs from beta regression mixed-effects models (logit link) investigating the effect of reef age on coral cover.

| Fixed effect (reef age) | Model estimates (±SE) | Post-hoc comparison | Estimate (β)±SE | Tukey’s HSD *p* |
| --- | --- | --- | --- | --- |
| Coral cover (Beta GLMM: χ² = 44.2, df = Inf, *p* < 0.001) | | | | |
| Degraded (baseline) | 0.059 ± 0.015 |  |  |  |
| Age 1 | 0.036 ± 0.023 | Degraded vs Age 1 | 0.5249 ± 0.720 | 0.996 |
| Age 2 | 0.197 ± 0.043 | Degraded vs Age 2 | -1.3568 ± 0.377 | 0.008 |
| Age 3 | 0.595 ± 0.046 | Degraded vs Age 3 | -3.1497 ± 0.325 | **<0.001** |
| Age 5 | 0.467 ± 0.035 | Degraded vs Age 5 | -2.6318 ± 0.301 | **<0.001** |
| Age 6 | 0.588 ± 0.033 | Degraded vs Age 6 | -3.1209 ± 0.296 | **<0.001** |
| Age 7 | 0.574 ± 0.046 | Degraded vs Age 7 | -3.0626 ± 0.325 | **<0.001** |
| Healthy | 0.545 ± 0.033 | Degraded vs Healthy | -2.9460 ± 0.295 | **<0.001** |
| Random effect: Site variance = 0.426 (SD = 0.652) | | | | |

**Table S3.** Pairwise Wilcoxon rank-sum test for butterflyfish abundance across locations.

| Post-hoc comparison | Statistic (W) | p.adj | p-value |
| --- | --- | --- | --- |
| Butterflyfish abundance per m²(Kruskal-Wallis test: χ² = 47.13, df = 6, *p* < 0.001) | | | |
| Bali vs Bontosua Healthy | 34.5 | 1 | 0.054 |
| Bali vs Bontosua Restored (Old) | 91.5 | 0.575 | 0.027 |
| Bali vs Bontosua Restored (Young) | 90.5 | 1 | 0.052 |
| Bali vs Christmas | 360 | 0.037 | <0.01 |
| Bali vs Iriomote | 466 | 0.003 | <0.001 |
| Bali vs Luzon | 377 | 1 | 0.178 |
| Bontosua Healthy vs Bontosua Restored (Old) | 78.5 | 0.135 | 0.915 |
| Bontosua Healthy vs Bontosua Restored (Young) | 52 | 1 | 0.006 |
| Bontosua Healthy vs Christmas | 200 | 0.006 | <0.001 |
| Bontosua Healthy vs Iriomote | 253 | 0.001 | <0.001 |
| Bontosua Healthy vs Luzon | 243 | 0.056 | 0.003 |
| Bontosua Restored (Old) vs Bontosua Restored (Young) | 112 | 0.210 | 0.01 |
| Bontosua Restored (Old) vs Christmas | 436 | 0.001 | <0.001 |
| Bontosua Restored (Old) vs Iriomote | 558 | 0.000075 | <0.001 |
| Bontosua Restored (Old) vs Luzon | 530 | 0.019 | <0.01 |
| Bontosua Restored (Young) vs Christmas | 108 | 1 | 0.593 |
| Bontosua Restored (Young) vs Iriomote | 142 | 1 | 0.362 |
| Bontosua Restored (Young) vs Luzon | 89.5 | 1 | 0.235 |
| Christmas vs Iriomote | 474 | 1 | 0.676 |
| Christmas vs Luzon | 330 | 0.628 | 0.03 |
| Iriomote vs Luzon | 344 | 0.057 | 0.003 |

**Table S4.** Kruskal–Wallis test results and pairwise post-hoc comparisons for species diversity (Shannon–Wiener H′)

| Post-hoc comparison | Statistic (W) | p.adj | p-value |
| --- | --- | --- | --- |
| Shannon-Wienner H’(Kruskal-Wallis test: χ² = 34.7, df = 6, *p* < 0.001 | | | |
| Bali vs Bontosua Healthy | **126** | **0.019** | **<0.01** |
| Bali vs Bontosua Restored (Old) | **292** | **0.000821** | **<0.001** |
| Bali vs Bontosua Restored (Young) | 99 | 0.223 | 0.011 |
| Bali vs Christmas | 344 | 0.125 | 0.006 |
| Bali vs Iriomote | **411** | **0.031** | **0.001** |
| Bali vs Luzon | 416 | 0.773 | 0.037 |
| Bontosua Healthy vs Bontosua Restored (Old) | 70 | 1.000 | 0.768 |
| Bontosua Healthy vs Bontosua Restored (Young) | 10 | 0.897 | 0.043 |
| Bontosua Healthy vs Christmas | 55 | 0.804 | 0.038 |
| Bontosua Healthy vs Iriomote | 77 | 1.000 | 0.103 |
| Bontosua Healthy vs Luzon | **41** | **0.038** | **0.002** |
| Bontosua Restored (Old) vs Bontosua Restored (Young) | 25 | 0.365 | 0.017 |
| Bontosua Restored (Old) vs Christmas | 141 | 0.208 | 0.010 |
| Bontosua Restored (Old) vs Iriomote | 197 | 1.000 | 0.050 |
| Bontosua Restored (Old) vs Luzon | **115** | **0.001** | **<0.001** |
| Bontosua Restored (Young) vs Christmas | 81 | 1.000 | 0.579 |
| Bontosua Restored (Young) vs Iriomote | 110 | 1.000 | 0.970 |
| Bontosua Restored (Young) vs Luzon | 70 | 1.000 | 0.068 |
| Christmas vs Iriomote | 454 | 1.000 | 0.588 |
| Christmas vs Luzon | 366 | 1.000 | 0.095 |
| Iriomote vs Luzon | 394 | 0.823 | 0.039 |

**Table S5.** Kruskal–Wallis test results and pairwise post-hoc comparisons for dominance species

| Location | Statistic (W) | Effect size (r) | p-value |
| --- | --- | --- | --- |
| Dominance species (Kruskal-wallis test, χ² = 27.1, df = 6, *p* < 0.001) | | | |
| Bontosua Restored (Young) | 37.5 | 0.119 | 0.102 |
| Bontosua Restored (Old) | 470 | 0.467 | <0.001 |
| Bontosua Healthy | 64 | 0.155 | <0.001 |
| Bali | 41 | 0.124 | <0.01 |
| Christmas | 175 | 0.155 | 0.0009 |
| Iriomote | 623 | 0.000 | 0.312 |
| Luzon | 413 | 0.111 | 0.008 |

**Table S6.** Outputs from generalised linear mixed-effects models (GLMMs; beta distribution with logit link) testing the effect of interaction type (conspecific vs. heterospecific) on butterflyfish interaction frequency across locations.

| Fixed effect (interaction type) | Model (estimates ± SE) | Post-hoc comparison | z-ratio | p-value |
| --- | --- | --- | --- | --- |
| Interaction Frequency (GLMM: estimate = 1.06, SE = 0.09, z = 12.15, *p* < 0.001) | | | | |
| Bontosua Restored (Young) | 0.16 ± 0.25 | Conspecific vs Heterospecific | 0.616 | 0.538 |
| Bontosua Restored (Old) | 0.68 ± 0.28 | Conspecific vs Heterospecific | 2.452 | 0.014 |
| Bontosua Healthy | 2.37 ± 0.40 | Conspecific vs Heterospecific | 5.952 | <0.0001 |
| Bali | –2.71 ± 0.13 | Conspecific vs Heterospecific | −21.260 | <0.0001 |
| Christmas | –2.66 ± 0.14 | Conspecific vs Heterospecific | −19.499 | <0.0001 |
| Iriomote | –2.76 ± 0.14 | Conspecific vs Heterospecific | −20.336 | <0.0001 |
| Luzon | -2.50 ± 0.14 | Conspecific vs Heterospecific | −18.220 | <0.0001 |
| Random effect (Site): variance = 2.67 × 10⁻² (SD = 1.64 × 10⁻¹) | | | | |

**Table S7.** Outputs from generalised linear mixed-effects models (GLMMs; beta distribution with logit link) testing the effect of interaction type (conspecific vs. heterospecific) on butterflyfish aggressiveness across locations.

| Fixed effect (interaction type) | Model estimates (β ± SE) | Post-hoc comparison | z-ratio | p-value |
| --- | --- | --- | --- | --- |
| Aggressiveness (GLMM: β = –0.11 ± 0.52, z = –0.21, *p* = 0.83) | | | | |
| Bontosua Restored (Young) | -0.10 ± 0.37 | Conspecific vs Heterospecific | −0.271 | 0.7860 |
| Bontosua Restored (Old) | 1.11 ± 0.52 | Conspecific vs Heterospecific | 0.213 | 0.8310 |
| Bontosua Healthy | 0.12 ± 0.53 | Conspecific vs Heterospecific | 0.226 | 0.8210 |
| Bali | 2.64 ± 0.35 | Conspecific vs Heterospecific | 7.568 | <0.0001 |
| Christmas Island | 1.25 ± 0.37 | Conspecific vs Heterospecific | 3.351 | 0.0008 |
| Iriomote | 3.13 ± 0.39 | Conspecific vs Heterospecific | 8.083 | <0.0001 |
| Luzon | 1.79 ± 0.35 | Conspecific vs Heterospecific | 5.080 | <0.0001 |
| Random effect (Site): variance = 2.73 × 10⁻⁹ (SD = 5.22 × 10⁻⁵)  Random effect (Fish ID): variance = 6.29 × 10⁻³ (SD = 7.93 × 10⁻²) | | | | |

**Table S8.** Aggressiveness levels of each butterflyfish species from all study sites. Species with fewer than 50 total interactions are not included in this table, but have been accounted for in the results.

| Focal species | Total interactions | Aggressive interactions | Aggressive percentage (%) |
| --- | --- | --- | --- |
| *Chaetodon citrinellus* | 204 | 59 | 28.9 |
| *Chaetodon trifascialis* | 419 | 115 | 27.4 |
| *Chaetodon guttatissimus* | 56 | 15 | 26.8 |
| *Chaetodon unimaculatus* | 115 | 26 | 22.6 |
| *Chaetodon lunulatus* | 392 | 84 | 21.4 |
| *Chaetodon kleinii* | 91 | 19 | 20.9 |
| *Chaetodon baronessa* | 251 | 48 | 19.1 |
| *Chaetodon plebeius* | 65 | 12 | 18.5 |
| *Chaetodon trifasciatus* | 93 | 15 | 16.1 |
| *Chaetodon auriga* | 83 | 12 | 14.5 |
| *Chaetodon ornatissimus* | 130 | 18 | 13.8 |
| *Chaetodon meyeri* | 91 | 11 | 12.1 |
| *Chaetodon rafflesii* | 195 | 22 | 11.3 |
| *Chaetodon vagabundus* | 74 | 8 | 10.8 |
| *Chaetodon speculum* | 141 | 8 | 5.7 |
| *Chaetodon octofasciatus* | **148** | **8** | **5.4** |
| *Chaetodon ephippium* | 61 | 1 | 1.6 |
